# Supplementary material
Source: PubMed Central journal article supplement (PMC6929969)
Supplement: cb9b00862_si_001.pdf [file cb9b00862_si_001.pdf]

# The diiron monooxygenase CmlA from chloramphenicol biosynthesis allows reconstitution of $\beta$ -hydroxylation during glycopeptide antibiotic biosynthesis

Milda Kaniusaite,<sup>1,2</sup> Robert J. A. Goode,<sup>1,3</sup> Ralf B. Schittenhelm,<sup>1,3</sup> Thomas M. Makris<sup>4</sup> and Max J. Cryle<sup>1,2\*</sup>

1. The Monash Biomedicine Discovery Institute, Department of Biochemistry and Molecular Biology, Monash University, Clayton, Victoria 3800, Australia.
2. EMBL Australia, Monash University, Clayton, Victoria 3800, Australia.
3. Monash Biomedical Proteomics Facility, Monash University, Clayton, Victoria 3800, Australia.
4. Department of Chemistry and Biochemistry, University of South Carolina, 631 Sumter Street, Columbia, South Carolina 29208, United States

\* Address correspondence to [max.cryle@monash.edu](mailto:max.cryle@monash.edu).

## Supporting Information

**Supplementary Table 1.** Primer sequences and template DNA used to clone Tcp11 module 6 hybrid constructs

| Final construct                                                 | Primers                                                                                                      | Insert template DNA                                           | Vector template DNA |
|-----------------------------------------------------------------|--------------------------------------------------------------------------------------------------------------|---------------------------------------------------------------|---------------------|
| Tcp11 module 6 hybrid (A <sub>tei</sub> -PCP <sub>sky7</sub> )  | FrM6_AT_1.FOR<br>AGAAGGAGATATACCATGAAACATCACCATC<br>FrM6_AT_1.REV<br>TCGCGGCCTGCAGACATCCCGG                  | Plasmid encoding<br>Tcp11 module 6<br>(A-PCP<br>architecture) | -                   |
|                                                                 | Fr2_Sky7.FOR<br>GTCTGCAGGCCGCGAGCCGC<br>Fr2_Sky7.REV<br>CCAAGCACTCTCGAGGGACTCCCGGGC                          | Plasmid encoding<br>Sky30 module 7<br>PCP                     |                     |
|                                                                 | Vector.FOR<br>CTCGAGAGTGCTTGGAGTCATCC<br>Vector.REV<br>GGTATATCTCCTTCTTAAAGTTAAACAAAATTATTCTAGAG<br>GG       | -                                                             | pET-GB1-1d series   |
| Tcp11 module 6 hybrid (A <sub>tei</sub> -PCP <sub>sky10</sub> ) | Fr1_Sky10.FOR<br>AGAAGGAGATATACCATGAAACATCACCATC<br>Fr1_Sky10.REV<br>GCGCGGCTTGCAGACATCCCGGCGAAATC           | Plasmid encoding<br>Tcp11 module 6<br>(A-PCP<br>architecture) | -                   |
|                                                                 | Fr2_Sky10.FOR<br>GTCTGCAAGCCGCGCCGCGggaac<br>Fr2_Sky10.REV<br>CCAAGCACTCTCGAGGGCAGTGGACTTCTCGCCGC            | Plasmid encoding<br>Sky31 module 10<br>PCP                    |                     |
|                                                                 | Vector.REV<br>GGTATATCTCCTTCTTAAAGTTAAACAAAATTATTCTAGAG<br>GG<br>Vector.FOR<br>CTCGAGAGTGCTTGGAGTCATCC       | -                                                             | pET-GB1-1d series   |
| Tcp11 module 6 hybrid (A <sub>tei</sub> -PCP <sub>kis6</sub> )  | F1_M6_AT.FOR<br>AGAAGGAGATATACCATGAAACATCACCATC<br>F1_M6_AT.REV<br>TCAGCATCTGCAGACATCCCGGCGAAATC             | Plasmid encoding<br>Tcp11 module 6<br>(A-PCP<br>architecture) | -                   |
|                                                                 | F2-Kis-PCP.FOR<br>GTCTGCAGATGCTGAACGGGCCG<br>F2-Kis-PCP.REV<br>GCAGCCGGATCAAGCTTACTTCTCGAAC                  | Plasmid encoding<br>KisK module 6<br>PCP                      |                     |
|                                                                 | V-M6AT(h).REV<br>GGTATATCTCCTTCTTAAAGTTAAACAAAATTATTCTAGAG<br>GG<br>V-M6AT(h).FOR<br>GCTTGATCCGGCTGCTAACAAAG | -                                                             | pET-GB1-1d series   |

**Supplementary Table 2.** Summary of HRMS data for all hexapeptide species reported in this work for both methylamide (M) and hydrolyzed (H) forms.

| Hexapeptide product |   | [M + H] <sup>+</sup><br>Theoretical | [M + H] <sup>+</sup><br>Observed | RT<br>(Min) | Δ(ppm) |
|---------------------|---|-------------------------------------|----------------------------------|-------------|--------|
| Bht                 | M | 986.35668                           | 986.35535                        | 27.10       | 1.33   |
|                     | H | 973.32504                           | 973.32452                        | 28.82       | 0.52   |
| Cl-Bht              | M | 1020.31770                          | 1020.31525                       | 29.70       | 2.45   |
|                     | H | 1007.28610                          | 1007.28546                       | 31.69       | 0.64   |
| F-Bht               | M | 1004.34725                          | 1004.34601                       | 27.86       | 1.24   |
|                     | H | 991.31562                           | 991.31537                        | 29.64       | 0.25   |
| Br-Bht              | M | 1064.26720                          | 1064.26685                       | 30.62       | 0.35   |
|                     | H | 1051.23560                          | 1051.23621                       | 32.62       | 0.61   |
| I-Bht               | M | 1112.25332                          | 1112.25574                       | 31.97       | 2.42   |
|                     | H | 1099.22168                          | 1099.2250                        | 34.11       | 3.30   |
| di-Cl-Bht           | M | 1054.27873                          | 1054.27734                       | 31.79       | 1.39   |
|                     | H | 1041.24710                          | 1041.24707                       | 34.29       | 0.03   |
| meta-Bht            | M | 986.35668                           | 986.35742                        | 24.96       | 0.75   |
|                     | H | 973.32504                           | 973.32593                        | 26.64       | 0.91   |
| β-OH Phe            | M | 970.36176                           | 970.36200                        | 31.57       | 0.25   |
|                     | H | 957.33013                           | 957.33118                        | 34.26       | 1.10   |

**Supplementary Table 3.** Summary of MS<sup>2</sup> data for all hexapeptide species indicating amino acid specific ammonium ions that originate from the alternate amino acid residues present at the C-terminus of the peptides.

| Fragment                             | Fragment Mass | Hexapeptide Product (% intensity)* |       |        |           |        |       |          |          |
|--------------------------------------|---------------|------------------------------------|-------|--------|-----------|--------|-------|----------|----------|
|                                      |               | Bht                                | F-Bht | Cl-Bht | Di-Cl-Bht | Br-Bht | I-Bht | β-OH Phe | meta-Bht |
| Bht/<br>Meta-Bht                     | 152.07061     | 0.20                               | -     | -      | -         | -      | -     | -        | 4.17     |
| (-H <sub>2</sub> O)                  | 134.06056     | 0.21                               | -     | -      | -         | -      | -     | -        | 0.41     |
| F-Bht                                | 170.06119     | -                                  | 1.45  | -      | -         | -      | -     | -        | -        |
| (-H <sub>2</sub> O)                  | 152.05114     | -                                  | 0.32  | -      | -         | -      | -     | -        | -        |
| Cl-Bht                               | 186.03164     | -                                  | -     | 1.76   | -         | -      | -     | -        | -        |
| (-H <sub>2</sub> O)                  | 168.02158     | -                                  | -     | 0.12   | -         | -      | -     | -        | -        |
| Di-Cl-Bht                            | 219.99267     | -                                  | -     | -      | 2.85      | -      | -     | -        | -        |
| (-H <sub>2</sub> O)                  | 201.98261     | -                                  | -     | -      | 0.31      | -      | -     | -        | -        |
| Br-Bht                               | 229.98112     | -                                  | -     | -      | -         | 1.34   | -     | -        | -        |
| (-H <sub>2</sub> O)                  | 211.97107     | -                                  | -     | -      | -         | 0.19   | -     | -        | -        |
| I-Bht                                | 277.96726     | -                                  | -     | -      | -         | -      | 1.35  | -        | -        |
| (-H <sub>2</sub> O)                  | 259.95720     | -                                  | -     | -      | -         | -      | 0.29  | -        | -        |
| β-OH<br>Phe/<br>meta-<br>Tyr/<br>Tyr | 136.07570     | 3.36                               | 3.26  | 3.80   | 4.21      | 3.42   | 3.23  | 8.54     | 6.16     |
| (-H <sub>2</sub> O)                  | 118.06564     | -                                  | -     | -      | -         | -      | -     | 0.81     | -        |
| Hpg                                  | 122.06005     | 100                                | 100   | 100    | 100       | 100    | 100   | 100      | 100      |
| Dpg                                  | 138.05496     | 16.0                               | 22.7  | 27.6   | 31.4      | 23.1   | 22.2  | 24.1     | 26.3     |

\* Fragments indicate the relative ion intensity for the specific fragments relative to the base peak in the MS<sup>2</sup> spectra (Hpg ammonium ion, set to 100%) conform to within 0.001 Dalton of the exact masses expected for the residue-specific losses. Expected fragments shown in gray boxes, with the only fragments not specific to the product peptide for the peptide containing β-OH Phe, as this is also the mass of the Tyr-2 residue present in all hexapeptides; eliminated fragment for β-OH Phe is only found in the MS<sup>2</sup> fragments for the correct hexapeptide.
